# Supplementary material
Source: PubMed Central journal article supplement (PMC8610846)
Supplement: mmc1.pdf [file mmc1.pdf]

## Supplemental Figure 1 COVID-19 restrictions and in-person vs. virtual learning

State-mandated contact restrictions in response to the pandemic changed multiple times during the study period. Restrictions in place in March and April 2020 were deescalated during May and June 2020, and reinstated in November. The following figure summarizes the mayor regulations prescribed by the Lower Saxony state government. Schools were open during the study period, with varying levels of in-person and virtual learning. Time point (TP) 1 occurred when school resumed after the summer break. TP2 occurred while school was in session and COVID-19 incidence was rising in the region, but before significant restrictions were implemented. TP3 occurred directly after the autumn break, with a first layer of restrictions in public life while school continued with in-person learning. TP4 occurred when a more restrictive lock-down took effect. TP5 occurred after a 4-month period of lock-down and home schooling.

For further details see <https://www.niedersachsen.de/Coronavirus/vorschriften/vorschriften-der-landesregierung-201461.html>.

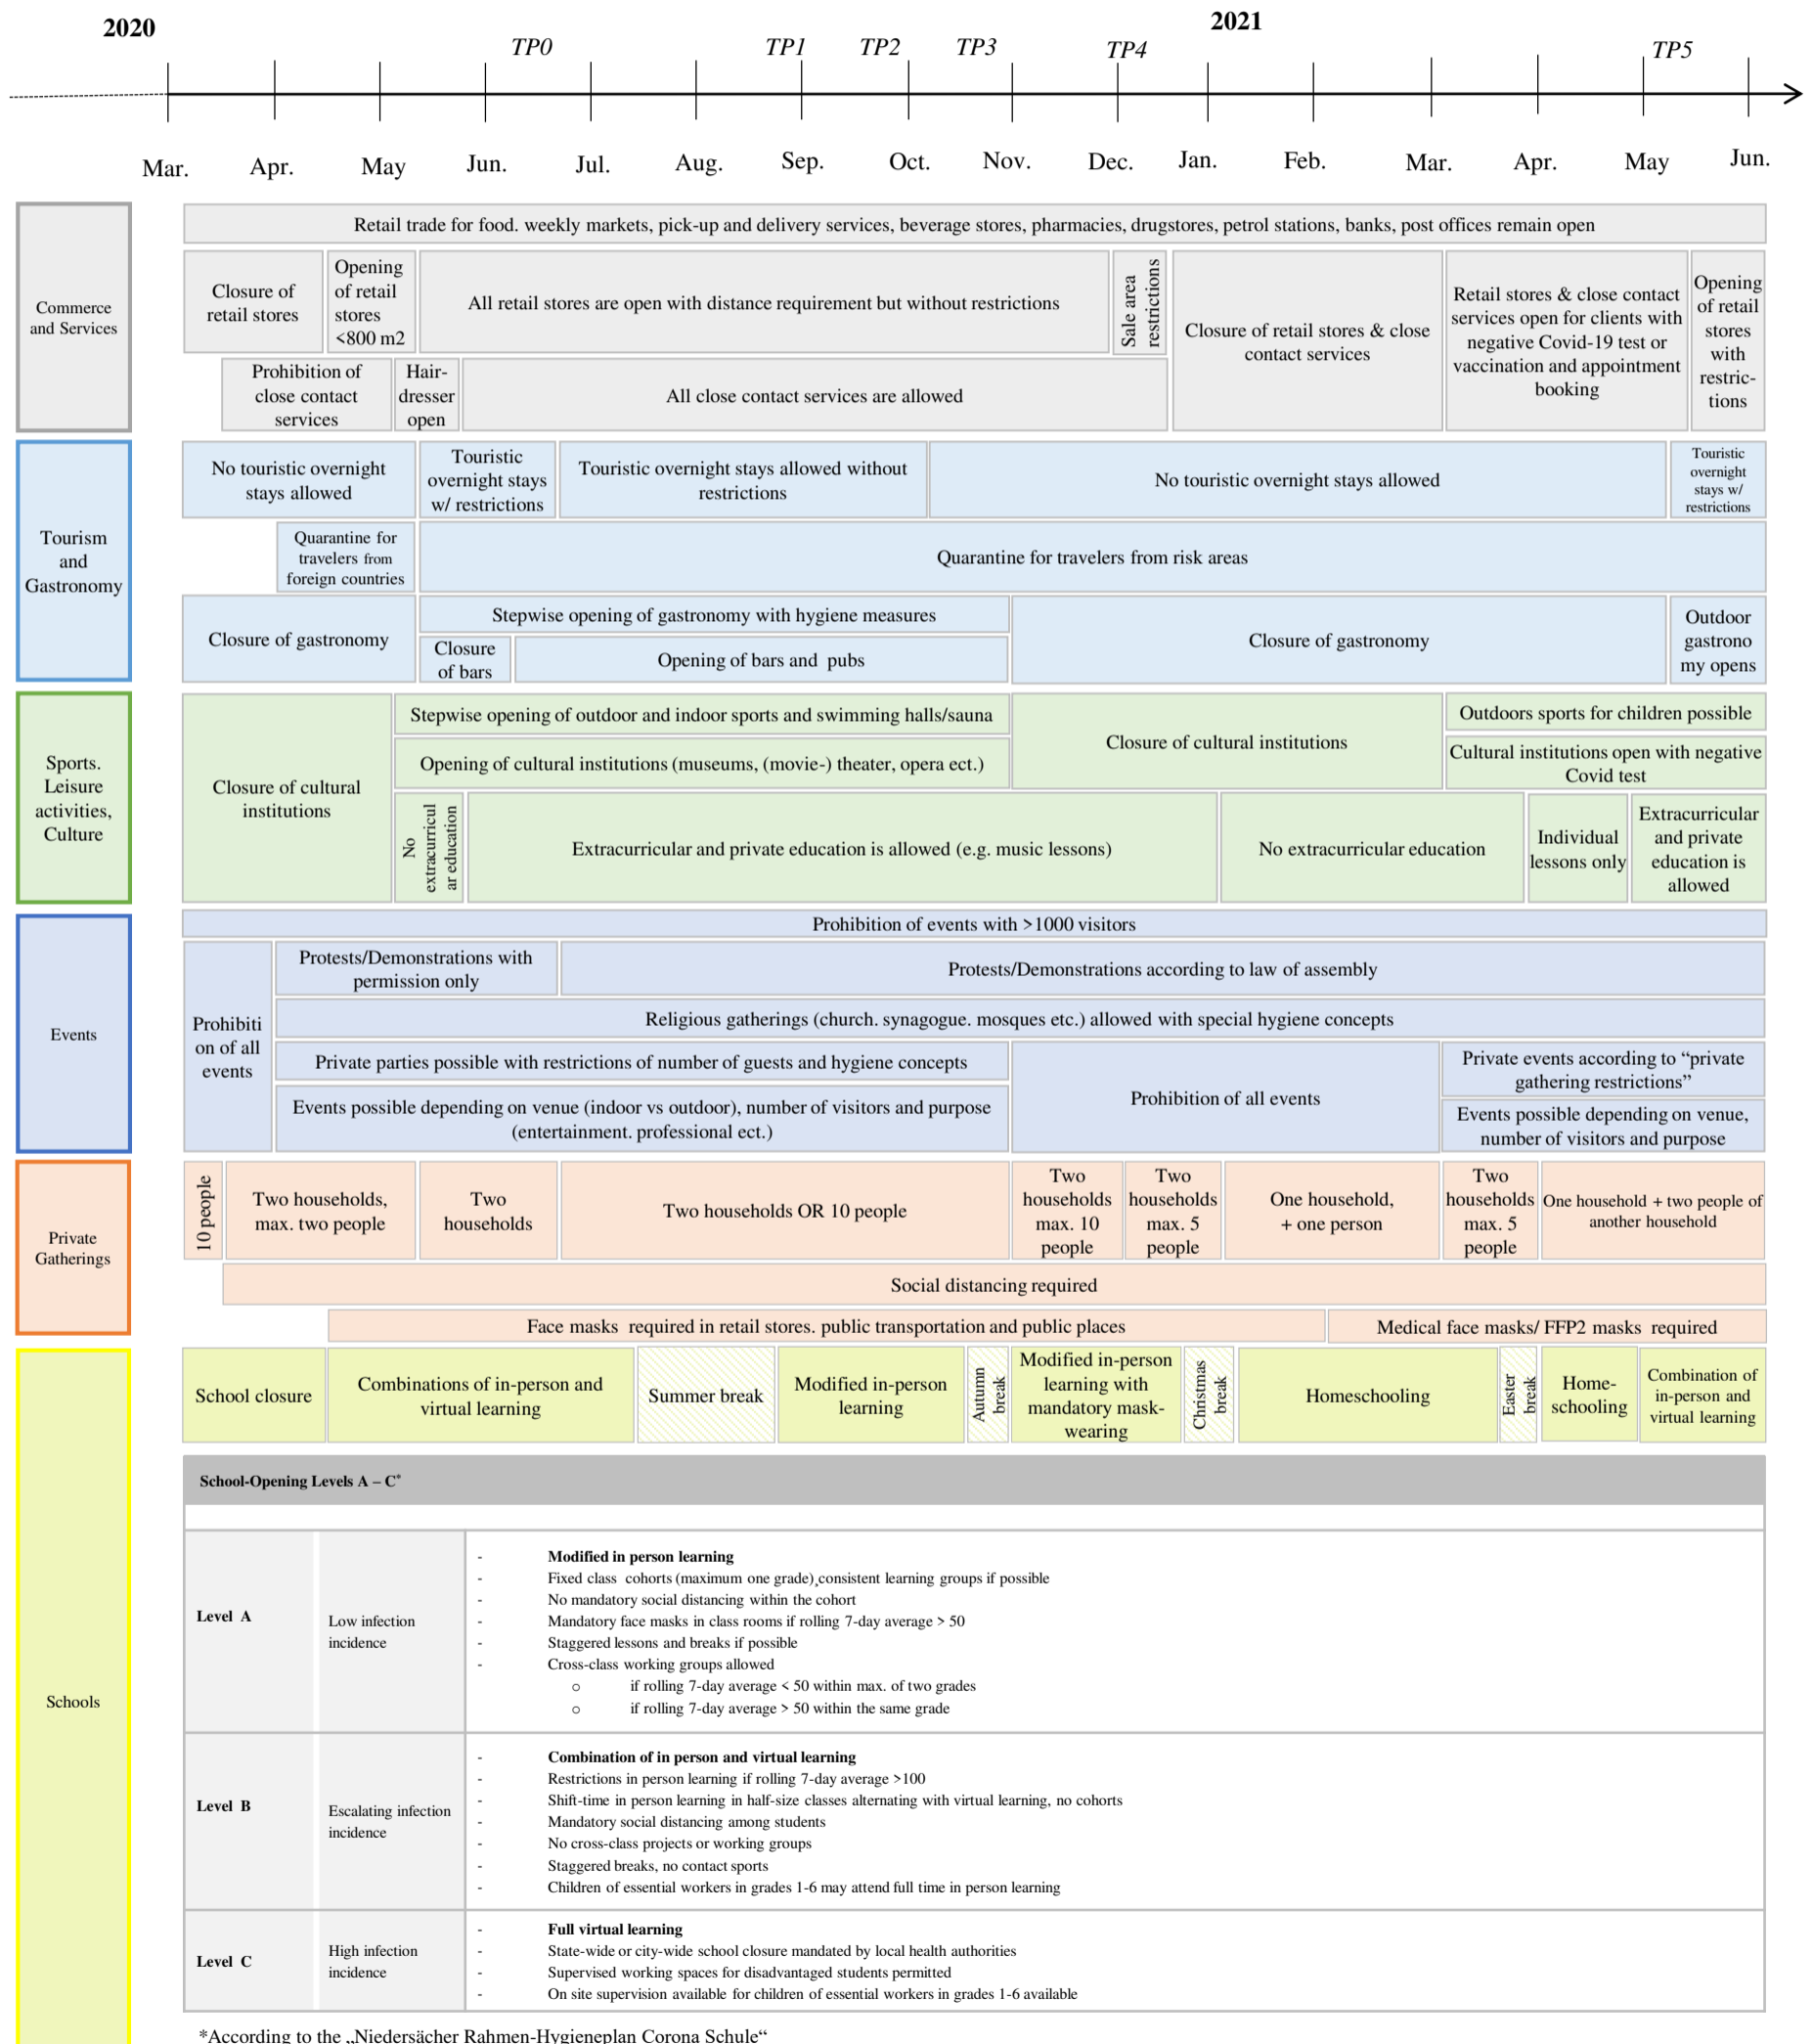

**TABLE A1 Students study participation and test results by time point**

|                                                                              | Time point of testing |         |     |         |     |         | No. of participants* | No. of tests** |
|------------------------------------------------------------------------------|-----------------------|---------|-----|---------|-----|---------|----------------------|----------------|
|                                                                              | TP0                   | TP1     | TP2 | TP3     | TP4 | TP5     |                      |                |
| <b>Participants</b>                                                          | 646                   | 637     | 625 | 662     | 544 | 469     | 779                  |                |
| <b>New participants per time point</b>                                       | -                     | 80      | 18  | 29      | 7   | -       | 132                  |                |
| <b>Pharyngeal swap PCR tests</b><br><i>(Positive tests in parentheses)</i>   | 642                   | 634     | 624 | 657 (1) | 542 | 465     | 777 (1)              | 3564 (1)       |
| <b>Serum sample Antibody tests</b><br><i>(Positive tests in parentheses)</i> | 570 (6)               | 501 (4) | -   | 494 (5) | -   | 370 (8) | 667 (13)             | 1935 (23)      |

\* No. of individuals participating in at least one testing time point

\*\* No. of accomplished tests of all individuals and time points

**TABLE A2 Demographics of study participants**

| Study participation per grade | Age (years) | Female sex | Hight (cm)  | Weight (kg)  | BMI         | Chronic disease | Medication | Smoking     | Household size | No. of children in household |           |
|-------------------------------|-------------|------------|-------------|--------------|-------------|-----------------|------------|-------------|----------------|------------------------------|-----------|
|                               | N (%)       | Mean (SD)  | N (%)       | Mean (SD)    | Mean (SD)   | Mean (SD)       | N (%)      | N (%)       | N (%)          | Mean (SD)                    | Mean (SD) |
| Grade 5                       | 84 (67.7%)  | 10.6 (0.4) | 40 (47.6%)  | 146.3 (5.9)  | 37.5 (7.9)  | 17.3 (2.8)      | 8 (9.6%)   | 4 (4.8%)    | 0 (0%)         | 4.0 (0.9)                    | 2.1 (0.9) |
| Grade 6                       | 79 (65.3%)  | 11.7 (0.4) | 33 (41.8%)  | 150.3 (6.5)  | 39.7 (8.0)  | 17.5 (2.6)      | 8 (10.4%)  | 8 (10.4%)   | 0 (0%)         | 4.2 (1.0)                    | 2.2 (0.9) |
| Grade 7                       | 101 (67.8%) | 12.6 (0.4) | 41 (40.6%)  | 156.8 (9.1)  | 44.6 (9.6)  | 17.9 (2.5)      | 9 (9.1%)   | 8 (8.1%)    | 0 (0%)         | 4.2 (1.1)                    | 2.2 (0.9) |
| Grade 8                       | 94 (76.4%)  | 13.7 (0.6) | 45 (47.9%)  | 163.4 (7.9)  | 49.7 (8.6)  | 18.6 (2.5)      | 10 (10.8%) | 8 (8.7%)    | 0 (0%)         | 4.2 (1.0)                    | 2.2 (1.0) |
| Grade 9                       | 98 (86.7%)  | 14.7 (0.5) | 46 (46.9%)  | 167.6 (7.6)  | 54.9 (9.3)  | 19.5 (2.8)      | 14 (14.3%) | 9 (9.2%)    | 2 (2.3%)       | 4.1 (1.1)                    | 2.1 (0.9) |
| Grade 10                      | 85 (72.0%)  | 15.7 (0.4) | 40 (47.1%)  | 172.6 (8.9)  | 58.1 (9.0)  | 19.5 (2.3)      | 10 (11.9%) | 13 (15.2%)  | 1 (1.3%)       | 4.2 (1.2)                    | 2.1 (0.9) |
| Grade 11                      | 83 (69.7%)  | 16.7 (0.5) | 33 (39.8%)  | 175.3 (10.4) | 63.6 (9.8)  | 20.6 (2.5)      | 10 (12.0%) | 13 (15.7%)  | 11 (14.1%)     | 3.9 (1.1)                    | 1.9 (0.9) |
| Grade 12                      | 76 (78.4%)  | 17.5 (0.5) | 39 (51.3%)  | 176.6 (8.5)  | 67.2 (11.1) | 21.5 (2.5)      | 10 (13.5%) | 27 (37.0%)  | 15 (21.4%)     | 3.7 (1.1)                    | 1.6 (0.8) |
| Grade 13                      | 77 (70.0%)  | 18.7 (0.5) | 44 (57.1%)  | 175.5 (9.6)  | 68.1 (11.4) | 22.0 (2.7)      | 7 (9.3%)   | 25 (33.8%)  | 31 (43.1%)     | 3.8 (1.0)                    | 1.8 (0.9) |
| <b>All students</b>           | 777 (72.3%) | 14.6 (2.6) | 361 (46.5%) | 164.8 (13.4) | 53.5 (14.1) | 19.3 (3.0)      | 86 (11.2%) | 115 (15.1%) | 60 (9.1%)      | 4.1 (1.1)                    | 2.0 (0.9) |

BMI, body mass index; SD, standard deviation

**TABLE A3 Sero-positive results and participants demographics**

|                   | Frequency of Participation | Sero-positiv antibody results |       |       |       |                       |               |             |     |                 |                      |                          |                |                 |                         |                               |               |                                                     |                                                              |
|-------------------|----------------------------|-------------------------------|-------|-------|-------|-----------------------|---------------|-------------|-----|-----------------|----------------------|--------------------------|----------------|-----------------|-------------------------|-------------------------------|---------------|-----------------------------------------------------|--------------------------------------------------------------|
|                   |                            | TP0                           | TP1   | TP3   | TP5   | Neutralizing antibody |               | Age (years) | Sex | Body Mass Index | Previous PCR Test    | Previous Antibody - Test | Smoking (past) | Chronic disease | Hhoushold Size          | No. of different activities Ø | Travel        | Selfestimated compliance with protective Measures Ø | Selfestimated compliance with protective Measures - Family - |
|                   |                            | Roche                         | Roche | Roche | Roche | NT50                  | NT 90         |             |     |                 |                      |                          |                |                 |                         |                               |               |                                                     |                                                              |
| <b>Student 1</b>  | 1x                         | 4,01                          | -     | -     | -     | 1:400 – 1:600         | 1:100 – 1:400 | 17          | m   | 22,8            | -                    | -                        | 0 (1)          | -               | 4 Children,<br>2 Adults | -                             | 0             | 8                                                   | 7                                                            |
| <b>Student 2</b>  | 4x                         | 118,4                         | 185   | 142,3 | -     | 1:400 – 1:600         | 1:100 – 1:400 | 12          | f   | 26              | -                    | -                        | 0              | -               | 1 Child,<br>1 Adults    | 9,7                           | 2xEU<br>3x DE | 9                                                   | 8                                                            |
| <b>Student 3</b>  | 6x                         | 104,9                         | -     | 124   | -     | 1:100 – 1:400         | 1:25 – 1:100  | 12          | m   | 16,2            | -                    | positive<br>23.06.20     | 0              | -               | 2 Children,<br>2 Adults | 6,8                           | 1xEU<br>1xD   | 7                                                   | 8                                                            |
| <b>Student 4</b>  | 5x                         | 128,7                         | 117,9 | 64,34 | -     | 1:400 – 1:600         | 1:100 – 1:400 | 15          | m   | -               | -                    | -                        | 0              | -               | 1 Child,<br>2 Adults    | 5,8                           | 1xD           | 7                                                   | 5                                                            |
| <b>Student 5</b>  | 6x                         | 4,66                          | 7,7   | 6,44  | 3,82  | no neutralization     |               | 17          | f   | 20,8            | -                    | -                        | 0              | Asthma          | 1 Child,<br>2 Adults    | 8,8                           | 0             | 7                                                   | 4                                                            |
| <b>Student 6</b>  | 5x                         | 49,96                         | 42,94 | 58,36 | -     | 1:25 – 1:100          | <1:25         | 16          | f   | 24,2            | -                    | -                        | 0 (1)          | -               | 2 Children,<br>2 Adults | 11,75                         | 1xEU          | 6,2                                                 | 8                                                            |
| <b>Student 7</b>  | 5x                         | neg.                          | neg.  | neg.  | 114,9 | 1:100 - 1:400         | 1:25 - 1:100  | 12          | f   | 18.1            | positive<br>18.12.20 | -                        | 0              | -               | 4 Children,<br>2 Adults | 6,25                          | 1xDE          | 7,6                                                 | 7                                                            |
| <b>Student 8</b>  | 6x                         | neg.                          | neg.  | neg.  | 85,45 | 1:400 - 1:600         | 1:100 - 1:400 | 19          | m   | 22.7            | positive<br>29.12.20 | -                        | 0              | DM I            | 1 Children,<br>3 Adults | 8,2                           | 2xEU<br>4x DE | 4,2                                                 | 2                                                            |
| <b>Student 9</b>  | 5x                         | neg.                          | neg.  | neg.  | 186,2 | 1:100 - 1:400         | 1:25 - 1:100  | 13          | f   | 16.9            | positive<br>15.03.21 | -                        | 0              | -               | 2 Children,<br>2 Adults | 6,5                           | 5x DE         | 8,2                                                 | 8                                                            |
| <b>Student 10</b> | 6x                         | neg.                          | neg.  | neg.  | 5,47  | no neutralization     |               | 16          | f   | -               | positive<br>13.03.21 | -                        | 0              | -               | 2 Children,<br>2 Adults | 5,8                           | 2xEU          | 7                                                   | 9                                                            |
| <b>Student 11</b> | 5x                         | neg.                          | neg.  | -     | 41,63 | 1:25 - 1:100          | < 1:25        | 18          | f   | 23.9            | positive<br>18.12.20 | -                        | 1 (1)          | -               | 2 Children,<br>2 Adults | 9,5                           | 1x EU         | 7                                                   | 6                                                            |
| <b>Student 12</b> | 5x                         | -                             | neg.  | neg.  | 69,65 | 1:25 - 1:100          | < 1:25        | 15          | f   | 19.8            | -                    | -                        | 0              | -               | 1 Children,<br>2 Adults | 1,8                           | 0             | 9,2                                                 | 10                                                           |
| <b>Student 13</b> | 5x                         | -                             | neg.  | neg.  | 203,2 | 1:25 - 1:100          | < 1:25        | 11          | m   | -               | positive<br>15.01.21 | -                        | 0              | -               | 3 Children,<br>2 Adults | 6,6                           | 1x EU         | 8,2                                                 | 8                                                            |

TP, time point; NT50, 50% neutralizing titer; NT90, 90% neutralizing titer; neg., negative; f, female; m, male; DM I, Diabetes mellitus Typ I; Ø, average of all time points; EU, Europe; DE, Germany;

**TABLE A4** Sex and age differences of individual activities

|                                                          | Sex difference<br><i>female vs. male</i> |               |         | Age difference<br><i>16-20 years vs. 9-12 years</i> |                |         |
|----------------------------------------------------------|------------------------------------------|---------------|---------|-----------------------------------------------------|----------------|---------|
|                                                          | OR<br>(female)                           | 95% CI        | p-value | OR<br>(16-20 years)                                 | 95% CI         | p-value |
| <i>Activities permitted during whole study period</i>    |                                          |               |         |                                                     |                |         |
| Meeting Friends                                          | 1.39                                     | [1.02 - 1.9]  | 0.04    | 1.83                                                | [1.13 - 2.95]  | 0.0080  |
| Meeting Family                                           | 1.12                                     | [0.89 - 1.41] | 0.31    | 1.23                                                | [0.87 - 1.72]  | 0.39    |
| Meeting Elderly Relatives                                | 0.99                                     | [0.78 - 1.25] | 0.92    | 0.78                                                | [0.55 - 1.09]  | 0.22    |
| Grocery Store                                            | 1.67                                     | [1.25 - 2.23] | <0.0001 | 6.79                                                | [4.19 - 10.98] | <0.0001 |
| Lake, River or Ocean                                     | 0.69                                     | [0.52 - 0.89] | 0.01    | 1.71                                                | [1.12 - 2.59]  | 0.0068  |
| Church                                                   | 1.09                                     | [0.80 - 1.47] | 0.59    | 0.69                                                | [0.42 - 1.34]  | 0.21    |
| Protest                                                  | 2.82                                     | [0.81 - 9.85] | 0.10    | ..                                                  | ..             | ..      |
| Local Public Transit                                     | 1.58                                     | [1.25 - 2.00] | <0.0001 | 2.31                                                | [1.64 - 3.26]  | <0.0001 |
| Long Distance Public Transit                             | 1.01                                     | [0.77 - 1.34] | 0.93    | 4.91                                                | [3.19 - 7.55]  | <0.0001 |
| <i>Activities not permitted at time point 4 and/or 5</i> |                                          |               |         |                                                     |                |         |
| Restaurant                                               | 0.89                                     | [0.71 - 1.12] | 0.32    | 3.1                                                 | [2.16 - 4.44]  | <0.0001 |
| Café                                                     | 1.67                                     | [1.31 - 2.12] | <0.0001 | 2.47                                                | [1.70 - 3.61]  | <0.0001 |
| Bar                                                      | 0.96                                     | [0.60 - 1.53] | 0.85    | 9.55                                                | [4.40 - 20.71] | <0.0001 |
| Party                                                    | 1.10                                     | [0.88 - 1.38] | 0.39    | 2.08                                                | [1.48 - 2.92]  | <0.0001 |
| Clothing Store                                           | 2.29                                     | [1.85 - 2.82] | <0.0001 | 2.26                                                | [1.63 - 3.13]  | <0.0001 |
| Store (except food or clothing)                          | 2.23                                     | [1.82 - 2.71] | <0.0001 | 1.52                                                | [1.13 - 2.05]  | 0.0025  |
| Music Lesson                                             | 1.15                                     | [0.86 - 1.55] | 0.31    | 0.33                                                | [0.21 - 0.54]  | <0.0001 |
| Gym                                                      | 0.73                                     | [0.53 - 0.99] | 0.05    | 7.10                                                | [4.45 - 11.32] | <0.0001 |
| Swimming Pool                                            | 1.09                                     | [0.81 - 1.45] | 0.58    | 0.45                                                | [0.29 - 0.71]  | <0.0001 |
| Sauna                                                    | 1.05                                     | [0.61 - 1.81] | 0.86    | 1.13                                                | [0.49 - 2.60]  | 0.98    |
| Museum                                                   | 1.01                                     | [0.73 - 1.40] | 0.93    | 1.51                                                | [0.93 - 2.45]  | 0.13    |
| (Movie-) Theater                                         | 1.56                                     | [1.08 - 2.25] | 0.02    | 2.48                                                | [1.40 - 4.38]  | <0.0001 |
| Concert                                                  | 0.86                                     | [0.35 - 2.11] | 0.75    | 1.80                                                | [0.49 - 6.55]  | 0.63    |
| Sport event                                              | 0.58                                     | [0.33 - 0.99] | 0.05    | 1.31                                                | [0.60 - 2.89]  | 0.79    |

Figure A2

Travel modes

a

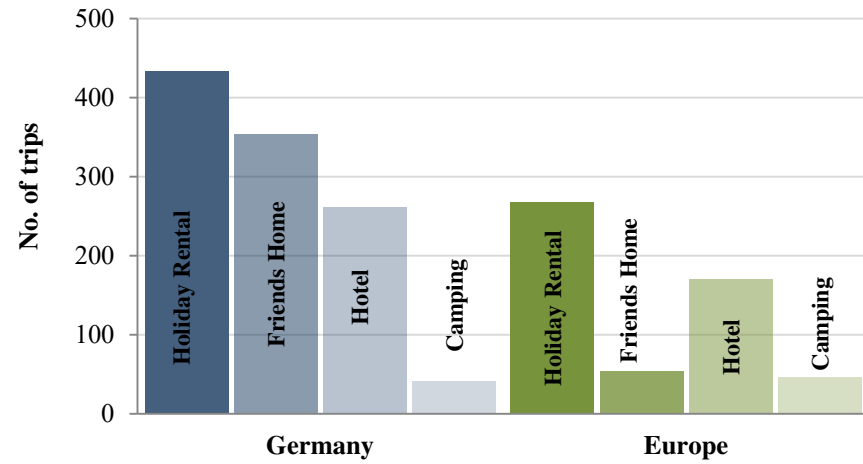

b

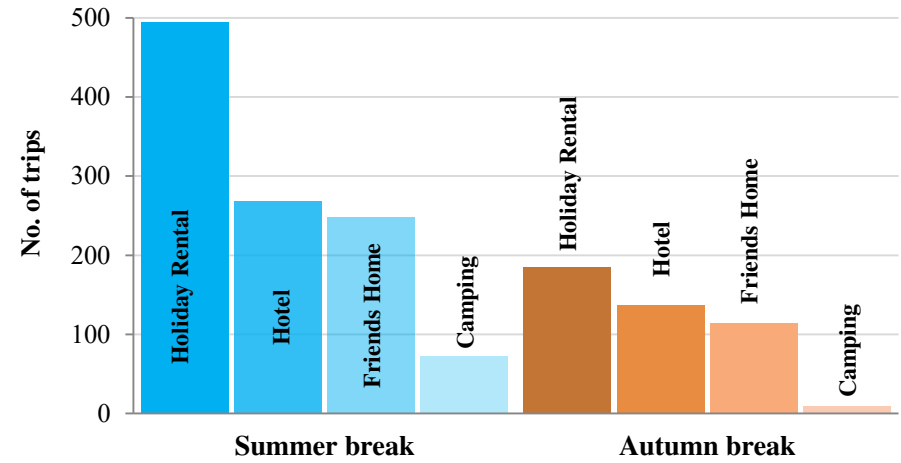

c

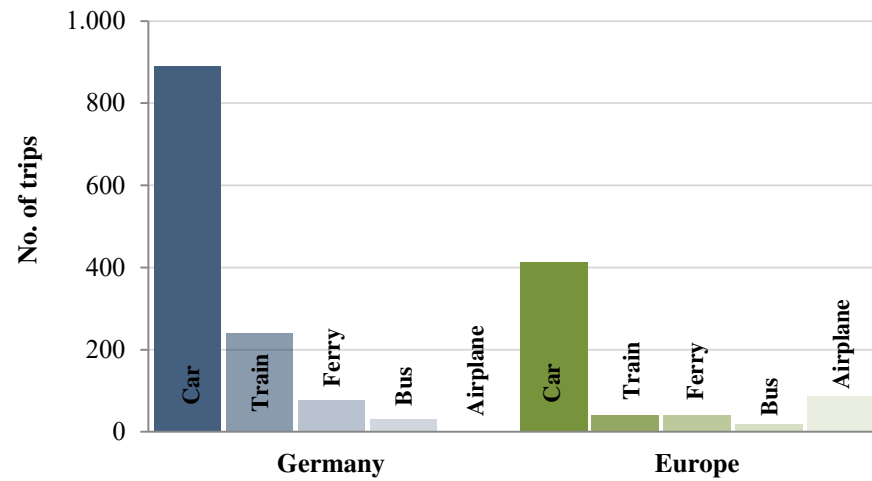

d

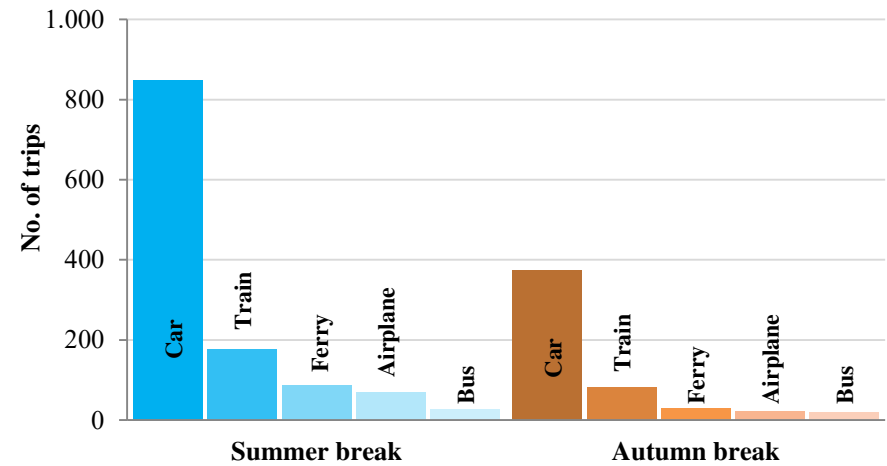

**Travel modes.** Number of trips by accommodation in Germany and Europe (a) and summer break versus autumn break (b). Number of trips by transportation in Germany and Europe (c) and summer break versus autumn break (d).

**TABLE A5 Linear mixed regression models for other factors influencing behavioral patterns**

| Covariate                   | Model I - Activity engagement |           |           | Model II - Number of trips |           |           | Model III - Self-estimated compliance with protective measures |           |           |
|-----------------------------|-------------------------------|-----------|-----------|----------------------------|-----------|-----------|----------------------------------------------------------------|-----------|-----------|
|                             | $\beta$                       | SE        | p - value | $\beta$                    | SE        | p - value | $\beta$                                                        | SE        | p - value |
| Intercept                   | 7.77                          | 0.39      | <0.0001   | 1.37                       | 0.08      | <0.0001   | 7.98                                                           | 0.19      | <0.0001   |
| Time point 2                | -2.22                         | 0.11      | <0.0001   | -1.40                      | 0.04      | <0.0001   | -0.09                                                          | 0.05      | 0.08      |
| Time point 3                | -2.11                         | 0.11      | <0.0001   | -0.88                      | 0.04      | <0.0001   | 0.06                                                           | 0.05      | 0.29      |
| Time point 4                | -4.62                         | 0.12      | <0.0001   | -1.44                      | 0.04      | <0.0001   | 0.23                                                           | 0.06      | <0.0001   |
| Time point 5                | -4.28                         | 0.13      | <0.0001   | -1.17                      | 0.04      | <0.0001   | 0.24                                                           | 0.06      | <0.0001   |
| Time point 1                |                               | Reference |           |                            | Reference |           |                                                                | Reference |           |
| Sex (female)                | 0.72                          | 0.16      | <0.0001   | 0.05                       | 0.04      | 0.10      | 0.13                                                           | 0.08      | 0.11      |
| Sex (male)                  |                               | Reference |           |                            | Reference |           |                                                                | Reference |           |
| Age (13-15 years)           | 0.87                          | 0.17      | <0.0001   | 0.03                       | 0.04      | 0.37      | -0.37                                                          | 0.08      | <0.0001   |
| Age (16-20 years)           | 1.53                          | 0.19      | <0.0001   | -0.03                      | 0.04      | 0.48      | -0.57                                                          | 0.09      | <0.0001   |
| Age (9-12 years)            |                               | Reference |           |                            | Reference |           |                                                                | Reference |           |
| Chronic disease             | 0.18                          | 0.40      | 0.66      | 0.11                       | 0.08      | 0.15      | -0.34                                                          | 0.20      | 0.08      |
| No chronic disease          |                               | Reference |           |                            | Reference |           |                                                                | Reference |           |
| Asthma                      | -0.73                         | 0.57      | 0.20      | -0.11                      | 0.11      | 0.34      | 0.45                                                           | 0.28      | 0.11      |
| No Asthma                   |                               | Reference |           |                            | Reference |           |                                                                | Reference |           |
| One college educated adult  | 0.49                          | 0.23      | 0.033     | 0.095                      | 0.05      | 0.03      | -0.07                                                          | 0.11      | 0.54      |
| Two college educated adults | 0.20                          | 0.23      | 0.39      | 0.14                       | 0.05      | 0.002     | -0.04                                                          | 0.11      | 0.75      |
| No college educated adult   |                               | Reference |           |                            | Reference |           |                                                                | Reference |           |
| Healthcare worker           | 0.16                          | 0.18      | 0.38      | 0.03                       | 0.03      | 0.43      | -0.06                                                          | 0.09      | 0.53      |
| No healthcare worker        |                               | Reference |           |                            | Reference |           |                                                                | Reference |           |
| Household size              | -0.06                         | 0.08      | 0.46      | -0.01                      | 0.02      | 0.59      | -0.06                                                          | 0.04      | 0.12      |

$\beta$ , regression coefficient; SE, standard error

**Figure A3 Behavior depending on chronic disease**

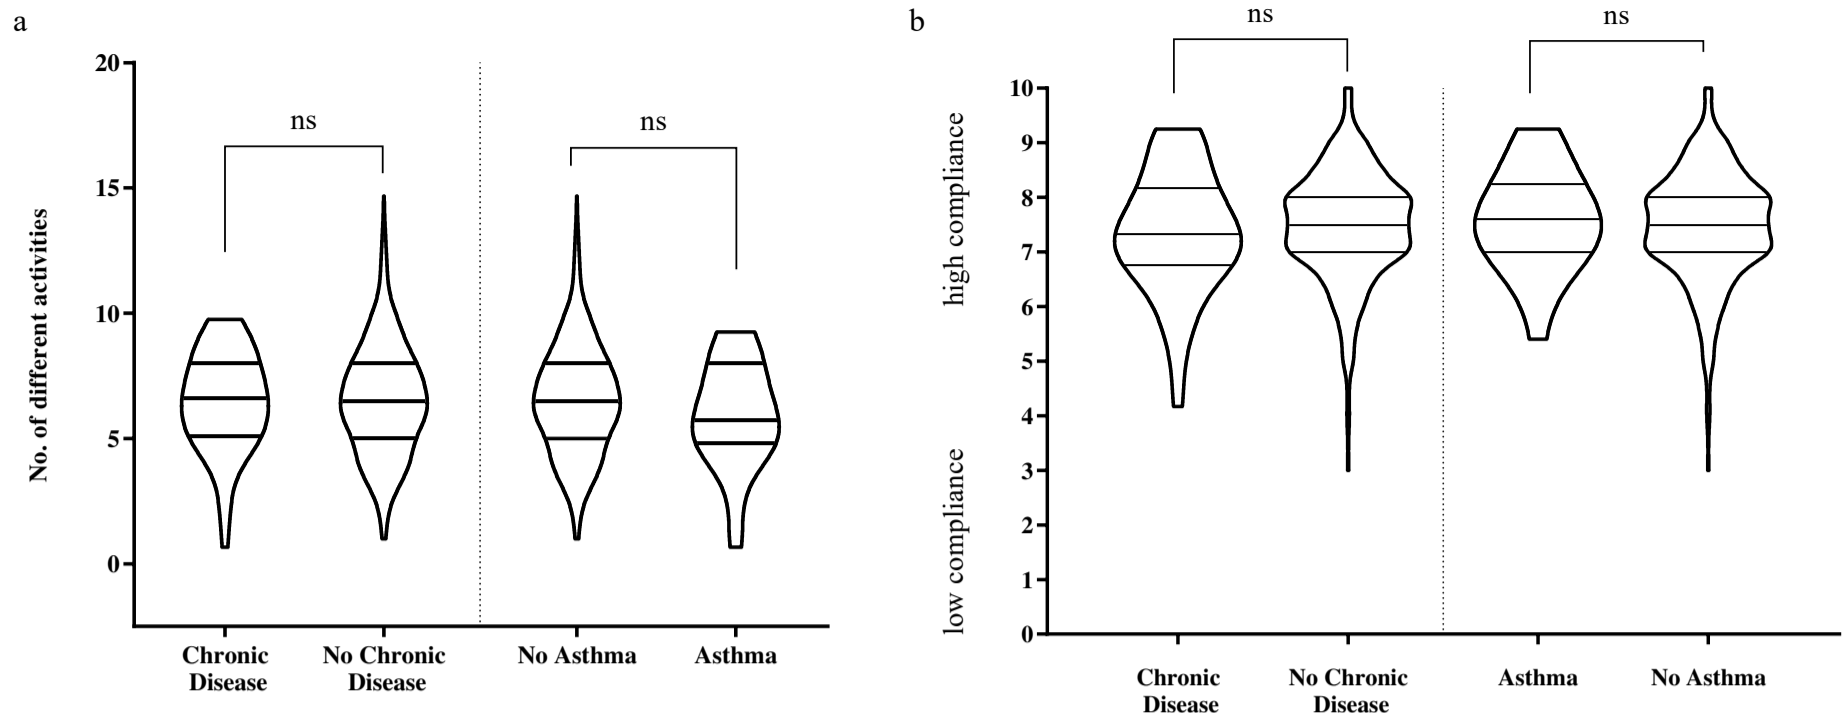

**Behavior depending on chronic disease.** (a) No difference in activities for students with chronic disease and no chronic disease reported. (b) No difference in self-estimated protection measures between students with chronic disease and no chronic disease reported.

**Figure A4 Behavior depending on social factors by profession**

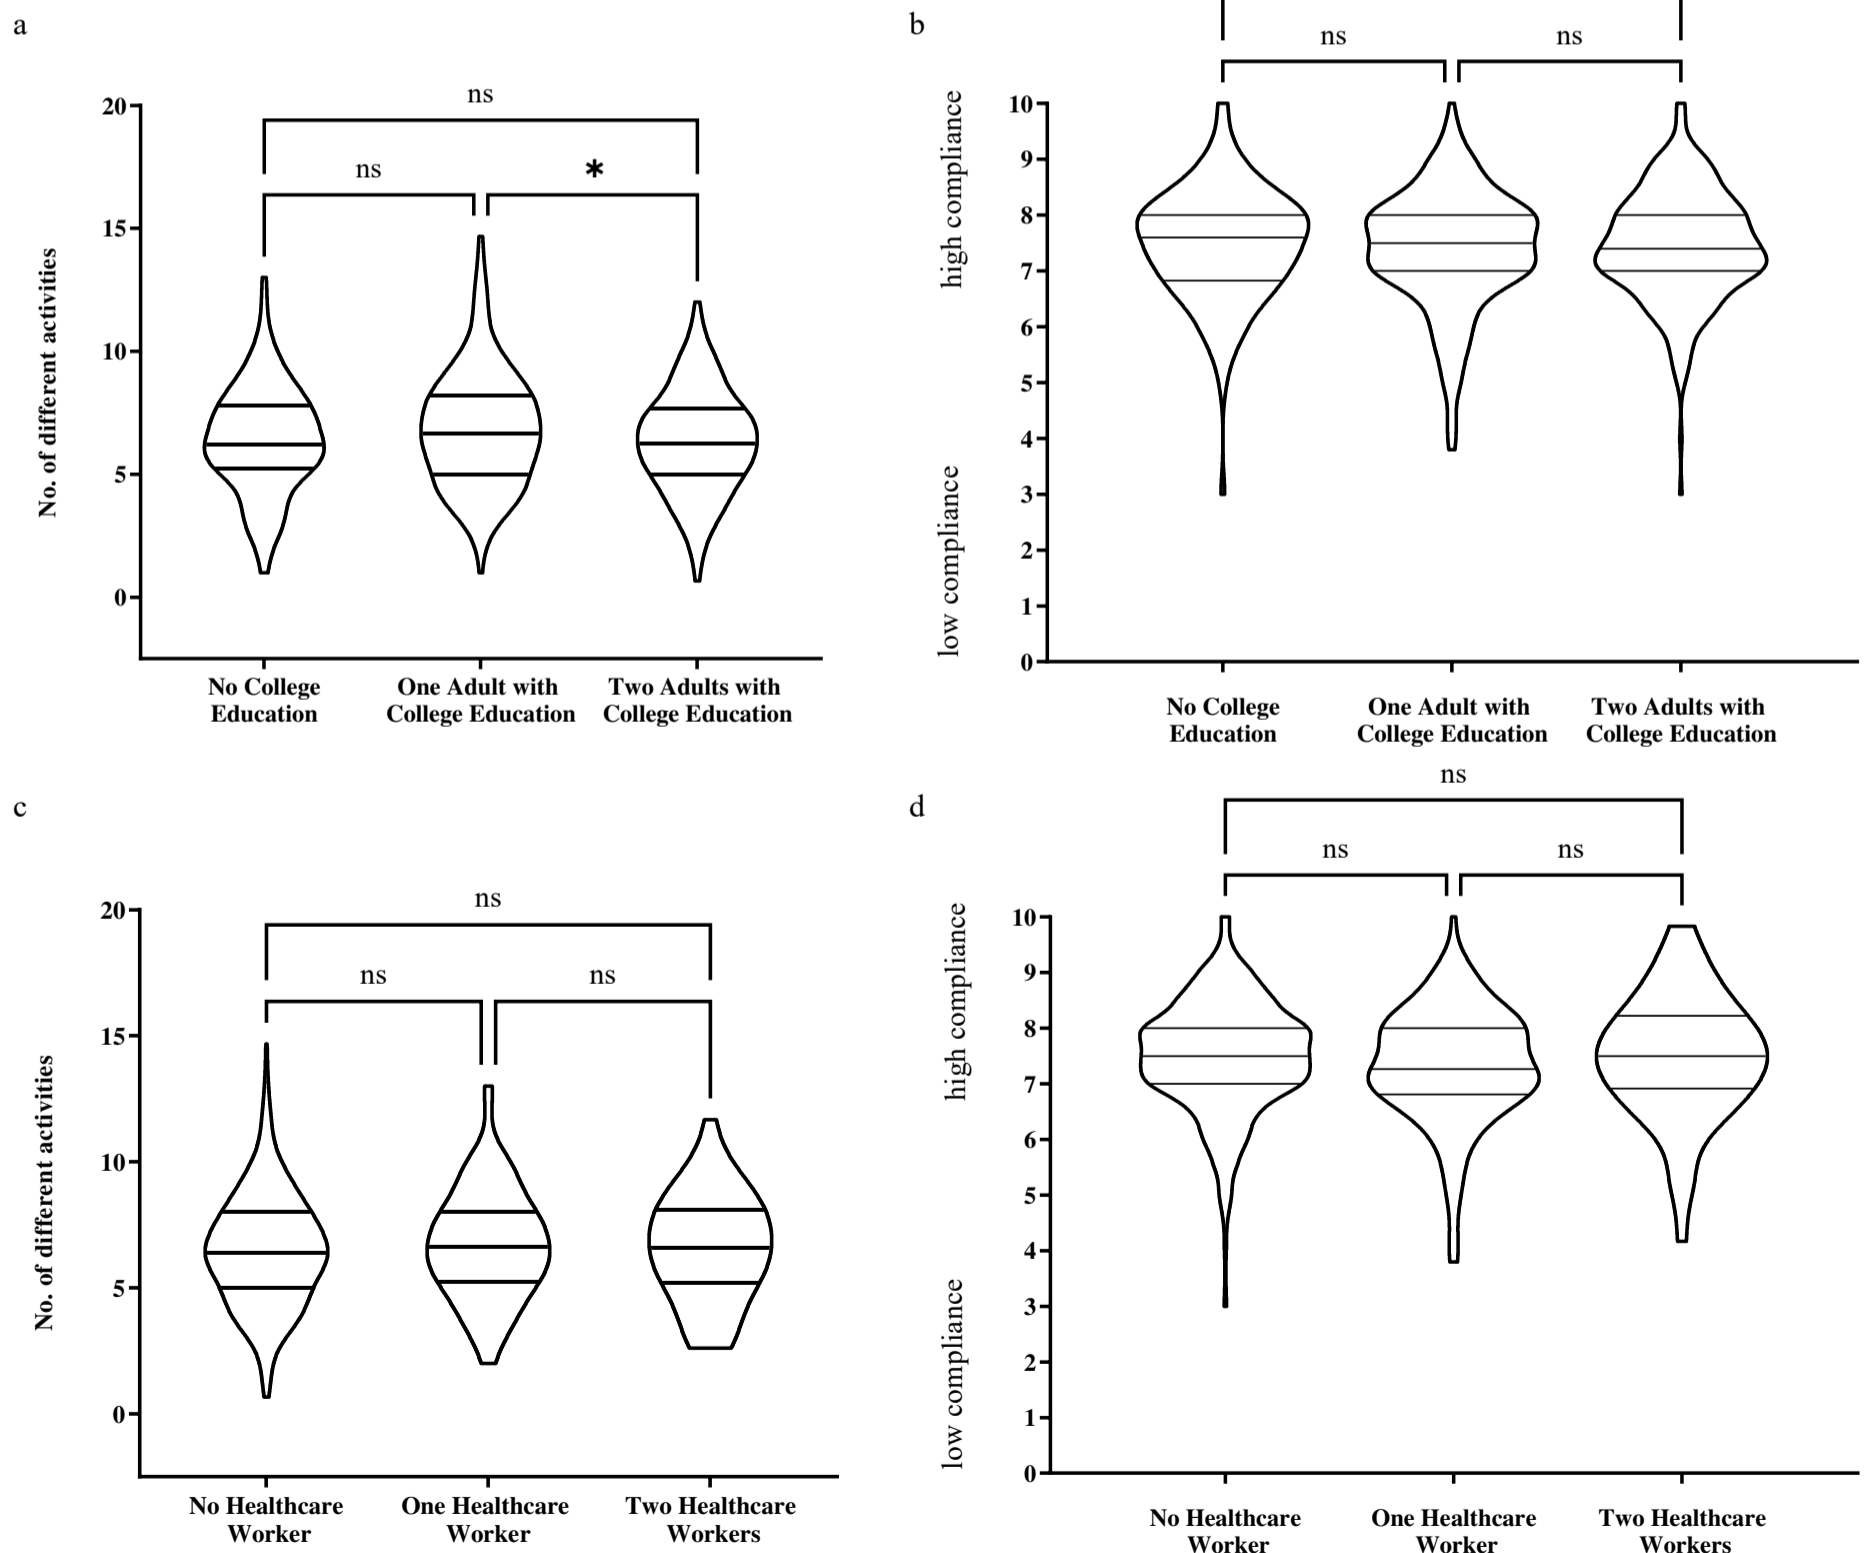

**Behavior depending on social factors by profession.** No difference in activities for students living in one household with no, one, or two “adults with college education” (a) or “healthcare workers (b) No difference in self-estimated protective measures between students living in one household with no, one, or two “adults with college education” (c) or “healthcare workers (d).
